# Supplementary material for: The Mediating Role of Dietary Inflammatory Index in the Association between Eating Breakfast and Obesity: A Cross-Sectional Study
Source: MDPI journal article supplement (doi:10.3390/nu14204378), 2022-10-19
Supplement: s1 [file s1]

## **Supplemental Material**

# **The Mediating Role of Dietary Inflammatory Index in the Association between Eating Breakfast and Obesity: A Cross-Sectional Study**

**Mengzi Sun †, Xuhan Wang †, Ling Wang, Wenyu Hu, Yixue Yang, Nan Yao, Jing Li, Zechun Xie, Ruirui Guo, Yuxiang Wang and Bo Li \***

Department of Epidemiology and Biostatistics, School of Public Health, Jilin University, Changchun 130021, China

\* Correspondence: li\_bo@jlu.edu.cn

† These authors contributed equally to this work.

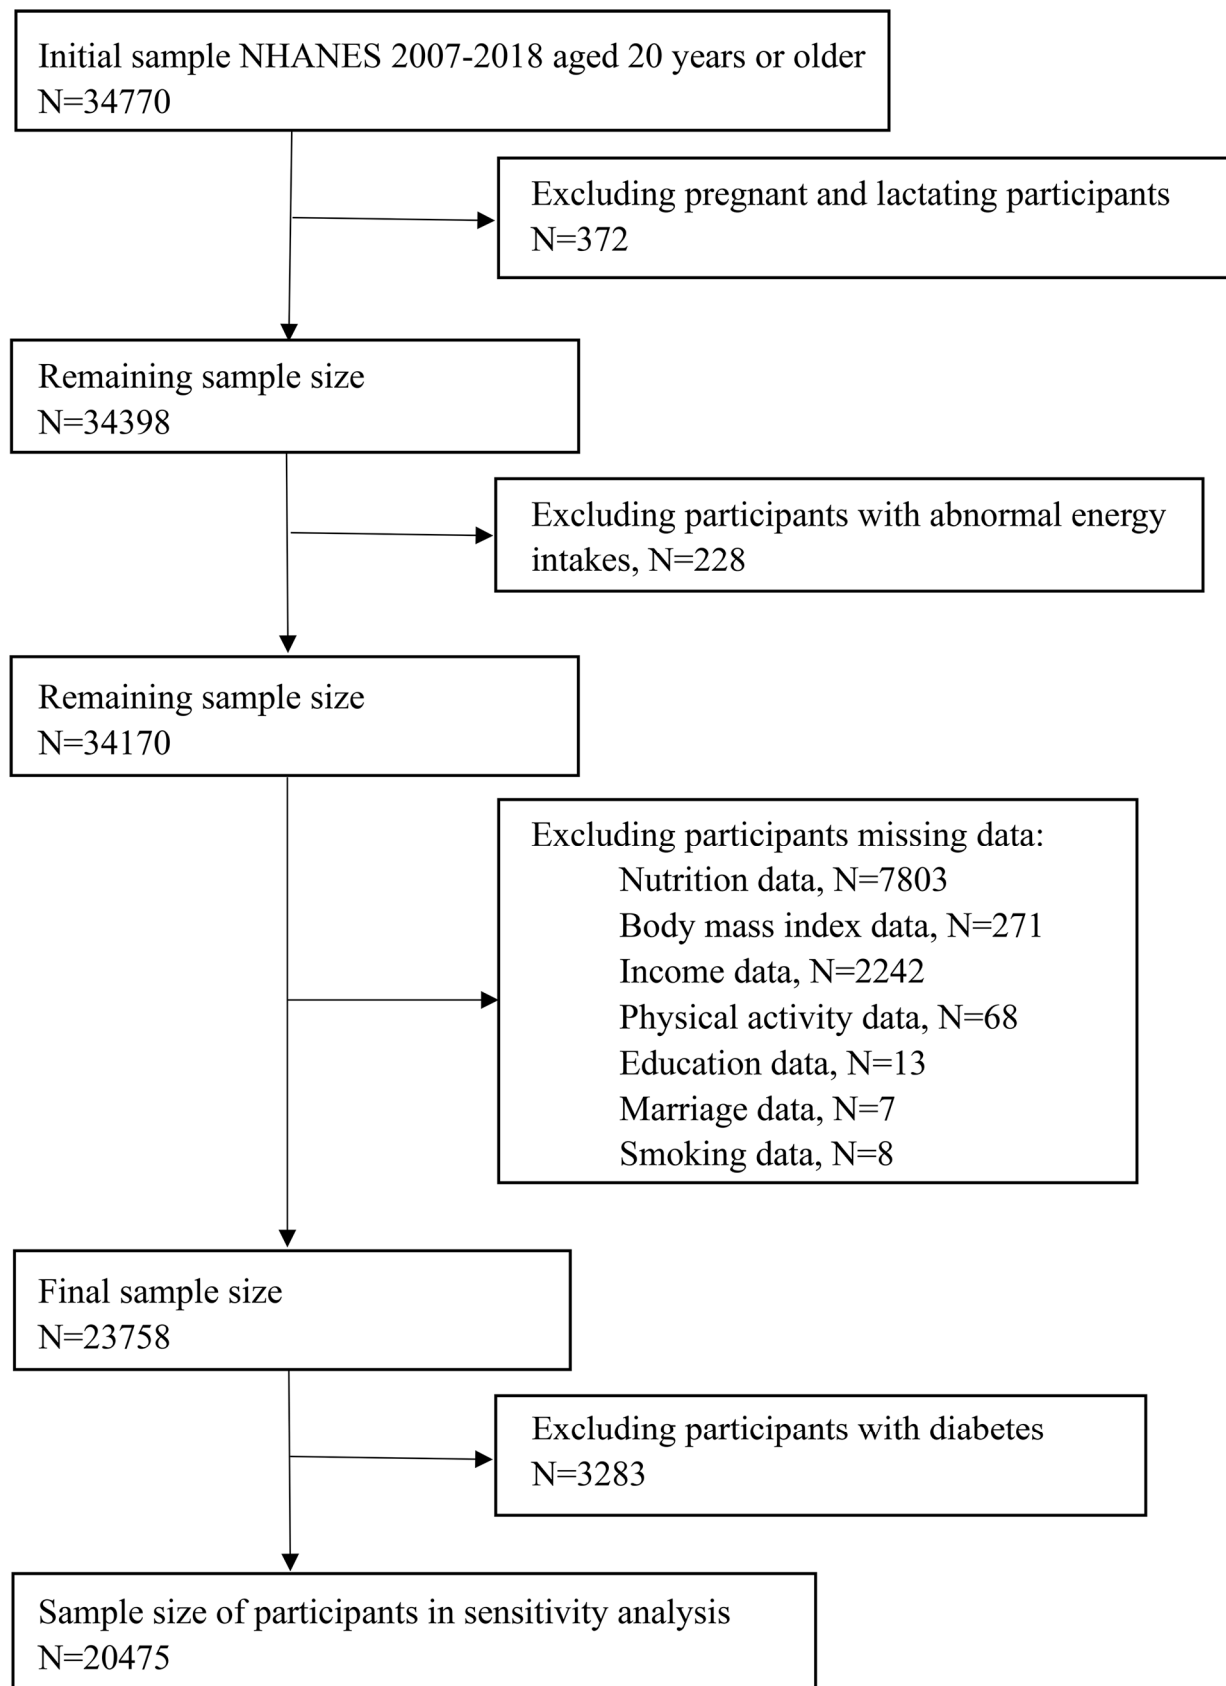

Figure S1. Selection process of subjects

Table S1. Characteristics of participants with and without obesity (Mean (SE)/N (%))

| Characteristics                    | Non-obesity<br>(N=14348) | Obesity<br>(N=9410) | $t/\chi^2$ | $P$    |
|------------------------------------|--------------------------|---------------------|------------|--------|
| DII (Mean (SE))                    | -0.24(0.04)              | 0.12(0.04)          | 8.447      | <0.001 |
| Dietary inflammation (N (%))       |                          |                     | 122.128    | <0.001 |
| Anti-Inflammatory diet             | 7382(55.9)               | 4176(48.5)          |            |        |
| Pro-Inflammatory diet              | 6966(44.1)               | 5234(51.5)          |            |        |
| Reported breakfast (N (%))         |                          |                     | 50.367     | <0.001 |
| Reported breakfast in both recalls | 11322(79.1)              | 7164(75.7)          |            |        |
| Reported breakfast in one recall   | 2233(15.6)               | 1595(17.1)          |            |        |
| Reported breakfast in no recalls   | 793(5.3)                 | 651(7.2)            |            |        |
| Age (N (%))                        |                          |                     | 79.701     | <0.001 |
| 20-39                              | 4869(38.4)               | 2734(32.7)          |            |        |
| 40-59                              | 4567(36.4)               | 3438(39.5)          |            |        |
| $\geq 60$                          | 4912(25.2)               | 3238(27.8)          |            |        |
| Sex (N (%))                        |                          |                     | 11.152     | 0.054  |
| Male                               | 7327(49.3)               | 4147(47.0)          |            |        |
| Female                             | 7021(50.7)               | 5263(53.0)          |            |        |
| Race (N (%))                       |                          |                     | 56.849     | <0.001 |
| Non-Hispanic White                 | 6574(69.7)               | 3976(65.0)          |            |        |
| Other                              | 7774(30.3)               | 5434(35.0)          |            |        |
| Education status (N (%))           |                          |                     | 73.460     | <0.001 |
| Below high school                  | 3042(13.5)               | 2161(15.4)          |            |        |
| High school                        | 3114(21.4)               | 2303(25.0)          |            |        |
| Above high school                  | 8192(65.1)               | 4946(59.6)          |            |        |
| Marital status (N (%))             |                          |                     | 0.350      | 0.679  |
| Living alone                       | 5666(36.8)               | 3819(37.2)          |            |        |
| Living with someone                | 8682(63.2)               | 5591(62.8)          |            |        |
| Income status (N (%))              |                          |                     | 63.465     | <0.001 |
| $\leq 130\%$ FPL                   | 4302(20.6)               | 3092(23.4)          |            |        |
| $>130$ to $\leq 350\%$ FPL         | 5307(34.1)               | 3693(36.5)          |            |        |
| $>350\%$ FPL                       | 4739(45.3)               | 2625(40.1)          |            |        |
| Smoking status (N (%))             |                          |                     | 60.933     | <0.001 |
| Never                              | 7961(56.8)               | 5222(55.5)          |            |        |
| Former                             | 3383(23.3)               | 2560(27.3)          |            |        |
| Current                            | 3004(19.9)               | 1628(17.2)          |            |        |
| Physical activity (N (%))          |                          |                     | 306.594    | <0.001 |
| Inactive                           | 5205(30.3)               | 4192(41.4)          |            |        |
| Active                             | 9143(69.7)               | 5218(58.6)          |            |        |
| Diabetes (N (%))                   |                          |                     | 855.483    | <0.001 |
| No                                 | 13087(94.6)              | 7388(83.0)          |            |        |
| Yes                                | 1261(5.4)                | 2022(17.0)          |            |        |
| Energy intake (Mean (SE))          | 2085.40(11.90)           | 2046.60(13.85)      | -2.378     | 0.019  |

Table S2. Stratified regression of the effect of reported breakfast on obesity

| Characteristics        | Reported breakfast in one<br>recall (N=3828) |                   | Reported breakfast in no<br>recalls (N=1444) |                   | <i>P</i> -interaction |
|------------------------|----------------------------------------------|-------------------|----------------------------------------------|-------------------|-----------------------|
|                        | <i>P</i>                                     | OR [95%CI]        | <i>P</i>                                     | OR [95%CI]        |                       |
| Dietary inflammation   |                                              |                   |                                              |                   | 0.518                 |
| Anti-Inflammatory diet | 0.014                                        | 1.22 [1.04, 1.43] | 0.260                                        | 1.23 [0.86, 1.78] |                       |
| Pro-Inflammatory diet  | 0.047                                        | 1.16 [1.00, 1.33] | <0.001                                       | 1.58 [1.28, 1.94] |                       |
| Age                    |                                              |                   |                                              |                   | 0.071                 |
| 20-39                  | 0.292                                        | 1.11 [0.91, 1.35] | <0.001                                       | 1.61 [1.28, 2.03] |                       |
| 40-59                  | 0.094                                        | 1.17 [0.97, 1.40] | 0.605                                        | 1.08 [0.80, 1.46] |                       |
| ≥60                    | 0.001                                        | 1.57 [1.21, 2.05] | 0.001                                        | 1.95 [1.34, 2.85] |                       |
| Sex                    |                                              |                   |                                              |                   | 0.100                 |
| Male                   | 0.090                                        | 1.13 [0.98, 1.30] | 0.007                                        | 1.37 [1.09, 1.73] |                       |
| Female                 | 0.007                                        | 1.23 [1.06, 1.44] | <0.001                                       | 1.64 [1.27, 2.11] |                       |
| Race                   |                                              |                   |                                              |                   | 0.878                 |
| Non-Hispanic White     | 0.035                                        | 1.17 [1.01, 1.36] | 0.004                                        | 1.47 [1.14, 1.91] |                       |
| Other                  | 0.009                                        | 1.18 [1.05, 1.34] | <0.001                                       | 1.43 [1.19, 1.72] |                       |
| Education status       |                                              |                   |                                              |                   | 0.946                 |
| Below high school      | 0.285                                        | 1.15 [0.89, 1.47] | 0.035                                        | 1.38 [1.02, 1.87] |                       |
| High school            | 0.204                                        | 1.16 [0.92, 1.45] | 0.021                                        | 1.60 [1.07, 2.39] |                       |
| Above high school      | 0.020                                        | 1.19 [1.03, 1.38] | 0.004                                        | 1.43 [1.13, 1.82] |                       |
| Marital status         |                                              |                   |                                              |                   | 0.788                 |
| Living alone           | 0.030                                        | 1.21 [1.02, 1.43] | 0.001                                        | 1.60 [1.21, 2.11] |                       |
| Living with someone    | 0.008                                        | 1.20 [1.05, 1.37] | 0.006                                        | 1.41 [1.11, 1.79] |                       |
| Income status          |                                              |                   |                                              |                   | 0.575                 |
| ≤130% FPL              | 0.609                                        | 1.05 [0.87, 1.27] | 0.005                                        | 1.49 [1.13, 1.95] |                       |
| >130 to ≤350% FPL      | 0.050                                        | 1.19 [1.00, 1.41] | 0.002                                        | 1.52 [1.16, 2.00] |                       |
| >350% FPL              | 0.053                                        | 1.23 [1.00, 1.51] | 0.062                                        | 1.38 [0.98, 1.94] |                       |
| Smoking status         |                                              |                   |                                              |                   | 0.033                 |
| Never                  | 0.001                                        | 1.32 [1.13, 1.55] | <0.001                                       | 1.65 [1.28, 2.13] |                       |
| Former                 | 0.123                                        | 1.19 [0.95, 1.49] | 0.043                                        | 1.54 [1.02, 2.34] |                       |
| Current                | 0.253                                        | 0.89 [0.72, 1.09] | 0.346                                        | 1.16 [0.85, 1.58] |                       |
| Physical activity      |                                              |                   |                                              |                   | 0.351                 |
| Inactive               | 0.032                                        | 1.22 [1.02, 1.47] | 0.011                                        | 1.43 [1.09, 1.88] |                       |
| Active                 | 0.028                                        | 1.15 [1.02, 1.31] | 0.001                                        | 1.48 [1.18, 1.86] |                       |
| Diabetes               |                                              |                   |                                              |                   | 0.008                 |
| No                     | 0.026                                        | 1.13 [1.02, 1.25] | <0.001                                       | 1.41 [1.17, 1.69] |                       |
| Yes                    | <0.001                                       | 2.05 [1.41, 2.99] | 0.004                                        | 2.37 [1.32, 4.26] |                       |
| Energy intake          |                                              |                   |                                              |                   | 0.417                 |

Table S3. Sensitivity analysis results of mediation effect of the DII on the association between reported breakfast and BMI in the population without diabetes

|                                    | N    | Direct Effect | Mediated (Indirect) Effect | Total Effect<br>(Exposure to Outcome) | Proportion<br>Mediated (%) |
|------------------------------------|------|---------------|----------------------------|---------------------------------------|----------------------------|
| Reported breakfast in both recalls | Ref  | Ref           | Ref                        | Ref                                   | Ref                        |
| Reported breakfast in one recall   | 3425 | 0.48***       | 0.23*                      | 0.71***                               | 32.39                      |
| Reported breakfast in no recalls   | 1307 | 0.75***       | 0.40*                      | 1.15***                               | 34.78                      |

Notes: Exposure: Reported breakfast; Outcome: BMI; Mediator: DII.

Model adjusted for Sex, Age, Race, Education status, Marital status, Income status, Smoking status, Physical activity, and Energy intake.

\* $p < 0.05$ ; \*\*\* $p < 0.001$ .

Table S4. Sensitivity analysis results of mediated effect of the DII on the association between reported breakfast and BMI for non-elderly

|                                    | N    | Direct Effect | Mediated (Indirect) Effect | Total Effect<br>(Exposure to Outcome) | Proportion<br>Mediated (%) |
|------------------------------------|------|---------------|----------------------------|---------------------------------------|----------------------------|
| Reported breakfast in both recalls | Ref  | Ref           | Ref                        | Ref                                   | Ref                        |
| Reported breakfast in one recall   | 3006 | 0.56***       | 0.22*                      | 0.78***                               | 28.21                      |
| Reported breakfast in no recalls   | 1235 | 0.80***       | 0.40*                      | 1.20***                               | 33.33                      |

Notes: Exposure: Reported breakfast; Outcome: BMI; Mediator: DII.

Model adjusted for Sex, Age, Race, Education status, Marital status, Income status, Smoking status, Physical activity, Diabetes, and Energy intake.

\* $p < 0.05$ ; \*\*\* $p < 0.001$ .

Table S5. Sensitivity analysis results of mediated effect of the DII on the association between reported breakfast and BMI for elderly

|                                    | N   | Direct Effect | Mediated (Indirect) Effect | Total Effect<br>(Exposure to Outcome) | Proportion<br>Mediated (%) |
|------------------------------------|-----|---------------|----------------------------|---------------------------------------|----------------------------|
| Reported breakfast in both recalls | Ref | Ref           | Ref                        | Ref                                   | Ref                        |
| Reported breakfast in one recall   | 822 | 0.84***       | 0.21*                      | 1.05***                               | 20.00                      |
| Reported breakfast in no recalls   | 209 | 2.02***       | 0.32*                      | 2.34***                               | 13.68                      |

Notes: Exposure: Reported breakfast; Outcome: BMI; Mediator: DII.

Model adjusted for Sex, Age, Race, Education status, Marital status, Income status, Smoking status, Physical activity, Diabetes, and Energy intake.

\*p < 0.05; \*\*\*p < 0.001.
